# Supplementary material for: TTK activates Akt and promotes proliferation and migration of hepatocellular carcinoma cells
Source: PubMed Central journal article supplement (PMC4741454; doi:10.18632/oncotarget.5295), 2015-09-19
Supplement: oncotarget-06-34309-s001.pdf [file oncotarget-06-34309-s001.pdf]

## SUPPLEMENTARY TABLE

**Supplementary Table S1: Peripheral blood AFP and TTK expression in HCC patients under age 50**

| SUM                          | Patients' categories                         |                  |                  |                 |
|------------------------------|----------------------------------------------|------------------|------------------|-----------------|
|                              | TTK high <sup>a</sup> /AFP high <sup>b</sup> | TTK low/AFP high | TTK high/AFP low | TTK low/AFP low |
| No. of patients <i>n</i> (%) | 29 (38.67)                                   | 17 (22.67)       | 18 (24.00)       | 11 (14.67)      |
| Diagnostic rate 1 (%)        | 61.33                                        |                  | -----            |                 |
| Diagnostic rate 2 (%)        | 85.33                                        |                  |                  | -----           |

<sup>a</sup>high of TTK mRNA expression in HCC specimens was designed as greater than or equal to 0.226

<sup>b</sup>high of peripheral blood AFP was designed as greater than or equal to 200 µg/l
